# Supplementary material for: Magnetic nanoparticles: preparation, physical properties, and applications in biomedicine
Source: Springer Nature journal article supplement (doi:10.1186/1556-276x-7-144), 2012-02-21

## Ferromagnetic NPs

## Superparamagnetic NPs

(a)

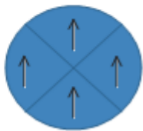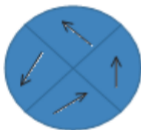

Applied magnetic field

No applied magnetic field

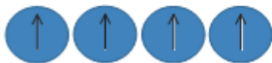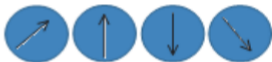

(b)

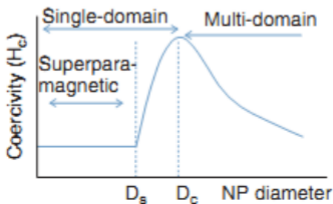

Supplement: 11671_2011_720_MOESM2_ESM.pdf [file 11671_2011_720_MOESM2_ESM.pdf]
