# Supplementary material for: Magnetic nanoparticles: preparation, physical properties, and applications in biomedicine
Source: Springer Nature journal article supplement (doi:10.1186/1556-276x-7-144), 2012-02-21

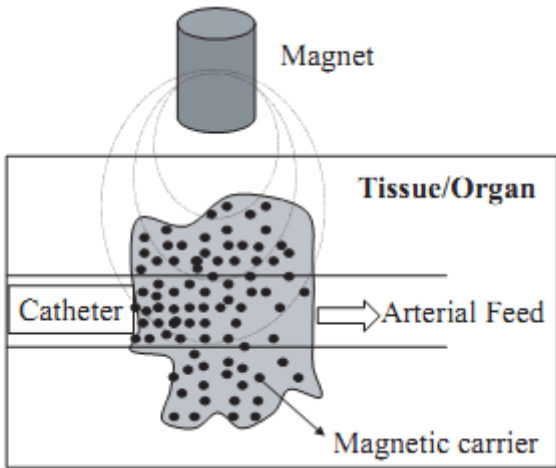

Supplement: 11671_2011_720_MOESM3_ESM.pdf [file 11671_2011_720_MOESM3_ESM.pdf]
